# Supplementary material for: Kindlin-2 deficiency induces fatal intestinal obstruction in mice
Source: PubMed Central journal article supplement (PMC7255029; doi:10.7150/thno.46553), 2020-05-15
Supplement: thnov10p6182s1.pdf [file thnov10p6182s1.pdf]

Figure S1

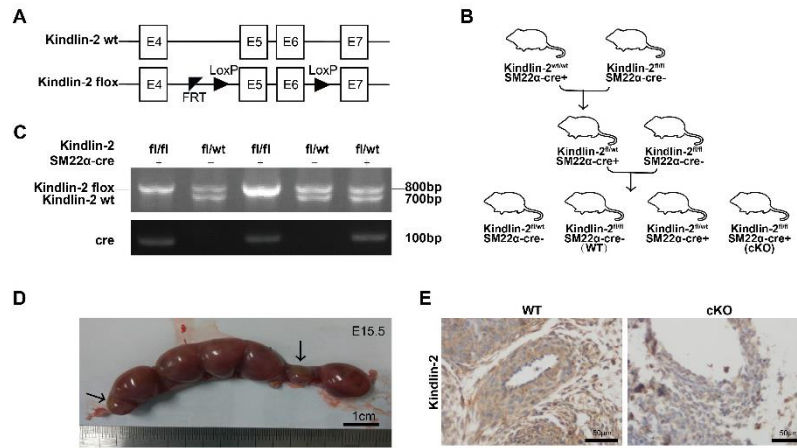

**Figure S1. Generation and identification of smooth muscle specific Kindlin-2 depletion mice model**

Related to Figure 1.

(A) A schematic of the relevant genomic region of Kindlin-2. The wild band (Kindlin-2 wt, up), and the franked locus (Kindlin-2 flox, below) is shown. Exons 5 and 6 of Kindlin-2 gene are flanked by loxP sites, a FRT site is remained as the floxed mice are derived from FRT knock-out-first mice; isosceles triangles indicate LoxP sites, and the rectangular triangle indicates FRT site. (B) Generation routine of smooth muscle (SM)-specific Kindlin-2 depletion mice. Kindlin-2 heterozygous depletion mice (Kindlin-2<sup>fl/wt</sup>, SM22 $\alpha$ -cre<sup>+</sup>) were generated by cross-breeding Kindlin-2 floxed (Kindlin-2<sup>fl/fl</sup>) mice with SM22 $\alpha$ -cre transgenic mice. Kindlin-2<sup>fl/wt</sup>, SM22 $\alpha$ -cre<sup>+</sup> mice backcrossed with Kindlin-2<sup>fl/fl</sup> mice to deliver SM-specific Kindlin-2 depletion mice. (C) Detection of mice genotype. DNA products were separated by size within a 2% agarose gel electrophoresis, The 800bp and 700bp bands represent Kindlin-2 floxed (Kindlin-2 flox) and wildtype (Kindlin-2 wt) alleles, respectively (up). Cre band is shown in the below panel. (D) Gross appearance of a uterus dissected from a 15.5d-pregnant female mouse, pregnancy was predicted using vagina plug. Arrows show arrested embryos. Scale bar, 1cm. (E) Immunohistochemistry of Kindlin-2 (brown), artery cross section at E12.5 were stained for testing Kindlin-2 protein level. Scale bar, 50 $\mu$ m.

Figure S2

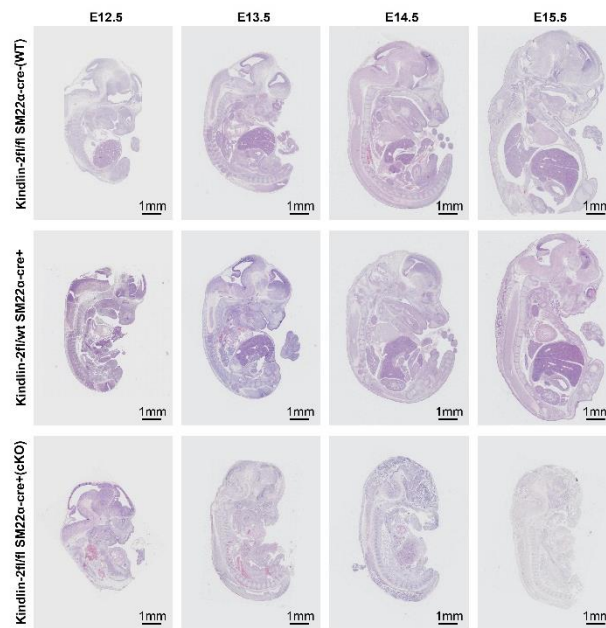

**Figure S2. Heterozygous depletion of Kindlin-2 exhibits no significant phenotype change compared with wild type mice.**

Related to Figure 1.

HE staining of the whole embryo sections at sagittal plane. The WT (upper), heterozygous littermates (Kindlin-2fl/wt, SM22α-cre+) and cKO mice (lower) were presented, time range from E12.5 to E14.5. Scale bar, 1mm

Figure S3

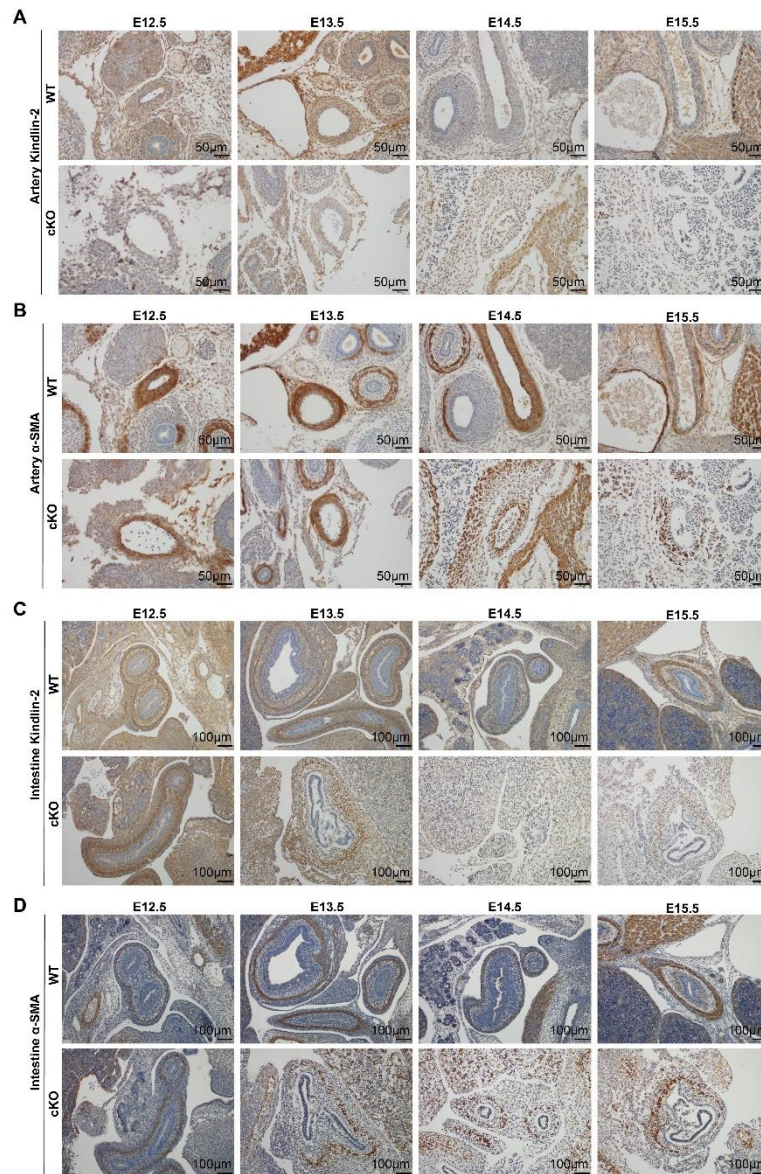

**Fig S3. cKO embryos display a decreased trend of Kindlin-2 and  $\alpha$ -SMA expression.**

Related to Figure 2.

(A) Immunohistochemical staining of E12.5-15.5 WT and Kindlin-2 cKO embryonic sections for Kindlin-2 in arteries. Scale bar, 50µm. (B) Immunohistochemical staining of E12.5-15.5 WT and Kindlin-2 cKO embryonic sections for  $\alpha$ -SMA in arteries. Scale bar, 50µm. (C) Immunohistochemical staining of E12.5-15.5 WT and Kindlin-2 cKO embryonic sections for Kindlin-2 in intestine. Scale bar, 100µm. (D) Immunohistochemical staining of E12.5-15.5 WT and Kindlin-2 cKO embryonic sections for  $\alpha$ -SMA in intestine. Scale bar, 100µm.

Figure S4

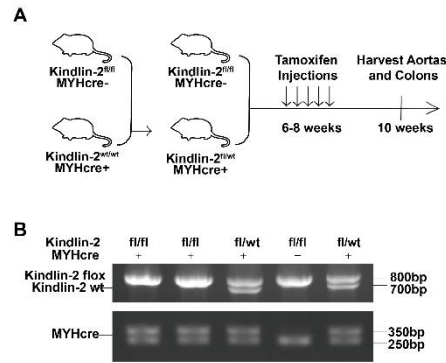

**Figure S4. Generation and identification of conditionally specific knockout of Kindlin-2 in adult mice smooth muscle.**

Related to Figure 3.

(A) Generation of Kindlin-2<sup>fl/fl</sup>;MYHcre+ mice and procedure of Tamoxifen treatment. Kindlin-2 heterozygous (Kindlin-2<sup>fl/wt</sup>;MYHcre+) mice were generated by cross-breeding Kindlin-2 floxed (Kindlin-2<sup>fl/fl</sup>) mice with MYHcre transgenic mice, and backcrossed with Kindlin-2<sup>fl/fl</sup> mice to produce Kindlin-2<sup>fl/fl</sup>;MYHcre+ mice. Mice were treated with tamoxifen via intraperitoneal injection starting at 6-8 weeks of age, following a 2-week rest period before other experiments. (B) Identification of mice genotype. DNA products were separated by size within a 2% agarose gel electrophoresis, The 800bp and 700bp bands represent Kindlin-2 floxed (Kindlin-2 flox) and wildtype (Kindlin-2 wt) alleles, respectively (up). In the below panel, two bands mean MYHcre positive; and a 250bp band means cre negative.

Figure S5

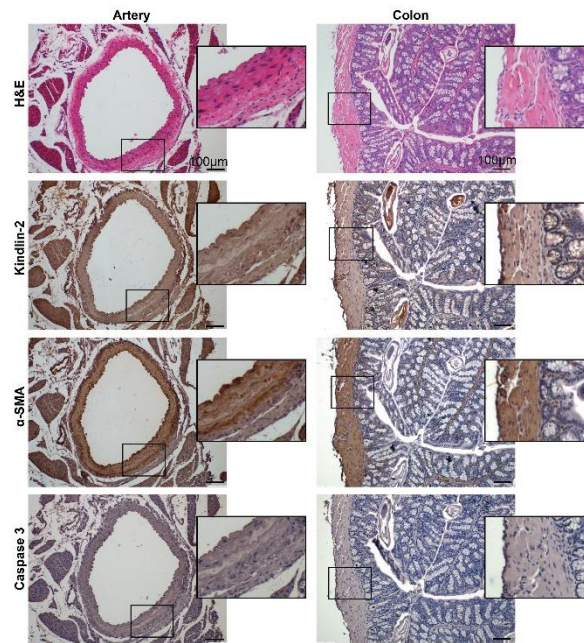

**Figure S5. Heterozygous depletion of Kindlin-2 exhibits no significant changes of  $\alpha$ -SMA and caspase3 level in smooth muscle tissues compared with wild type mice.**

Related to Figure 4.

H&E and Kindlin-2,  $\alpha$ -SMA and cleaved caspase 3 immunohistochemical staining of Kindlin-2fl/wt MYHcre+ aortas and colons. Mice were treated with tamoxifen injection at 8 weeks, and sigmoid colons were excised and fixed 14 days after injection. Scale bar, 100 $\mu$ m.

**Table S1 Birth rate of Kindlin-2<sup>fl/fl</sup>;SM22 $\alpha$ -cre- × Kindlin-2<sup>fl/wt</sup>;SM22 $\alpha$ -cre+offsprings classified by genotype**

| Genotype                                        | Gender | Number (rate)  |             | Theoretical Mendelian ratio |
|-------------------------------------------------|--------|----------------|-------------|-----------------------------|
| Kindlin-2 <sup>fl/wt</sup> ;SM22 $\alpha$ -cre- | ♂      | 26<br>(19.40%) | 50 (37.31%) | 25%                         |
|                                                 | ♀      | 24<br>(17.91%) |             |                             |
| Kindlin-2 <sup>fl/fl</sup> ;SM22 $\alpha$ -cre- | ♂      | 22<br>(16.42%) | 43 (32.09%) | 25%                         |
|                                                 | ♀      | 21<br>(15.67%) |             |                             |
| Kindlin-2 <sup>fl/wt</sup> ;SM22 $\alpha$ -cre+ | ♂      | 20<br>(14.93%) | 41 (30.60%) | 25%                         |
|                                                 | ♀      | 21<br>(15.67%) |             |                             |
| Kindlin-2 <sup>fl/fl</sup> ;SM22 $\alpha$ -cre+ | ♂      | 0 (0%)         | 0 (0%)      | 25%                         |
|                                                 | ♀      | 0 (0%)         |             |                             |
| Total                                           | ♂+♀    | 134 (100%)     | 134 (100%)  | 100%                        |

**Table S2**

**Statistics of embryonic development at indicated time point**

| day      | E12.5 |     | E13.5 |     | E14.5 |     | E15.5 |     |
|----------|-------|-----|-------|-----|-------|-----|-------|-----|
| genotype | WT    | cKO | WT    | cKO | WT    | cKO | WT    | cKO |
| normal   | 19    | 5   | 21    | 2   | 31    | 0   | 32    | 0   |
| abnormal | 0     | 0   | 0     | 1   | 0     | 0   | 0     | 0   |
| death    | 0     | 0   | 0     | 0   | 0     | 10  | 0     | 8   |

**Table S3 Birth rate of Kindlin-2<sup>fl/fl</sup>;Tie2-cre- × Kindlin-2<sup>fl/wt</sup>;Tie2-cre+offsprings classified by genotype**

| Genotype                              | Gender | Number (rate) |          | Theoretical Mendelian ratio |
|---------------------------------------|--------|---------------|----------|-----------------------------|
| Kindlin-2 <sup>fl/wt</sup> ;Tie2-cre- | ♂      | 16 (18.39%)   | 31       | 25%                         |
|                                       | ♀      | 15 (17.24%)   | (35.63%) |                             |
| Kindlin-2 <sup>fl/fl</sup> ;Tie2-cre- | ♂      | 13 (14.94%)   | 29       | 25%                         |
|                                       | ♀      | 16 (18.39%)   | (33.33%) |                             |
| Kindlin-2 <sup>fl/wt</sup> ;Tie2-cre+ | ♂      | 12 (13.79%)   | 27       | 25%                         |
|                                       | ♀      | 15 (17.24%)   | (31.03%) |                             |
| Kindlin-2 <sup>fl/fl</sup> ;Tie2-cre+ | ♂      | 0 (0%)        | 0 (0%)   | 25%                         |
|                                       | ♀      | 0 (0%)        |          |                             |
| Total                                 | ♂+♀    | 87(100%)      | 87(100%) | 100%                        |
